# Supplementary material
Source: PubMed Central journal article supplement (PMC4406223)

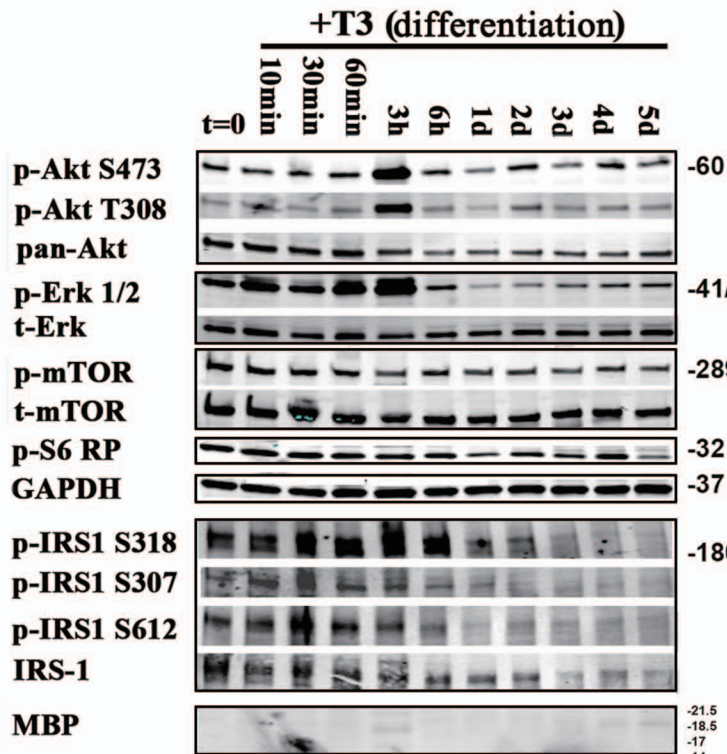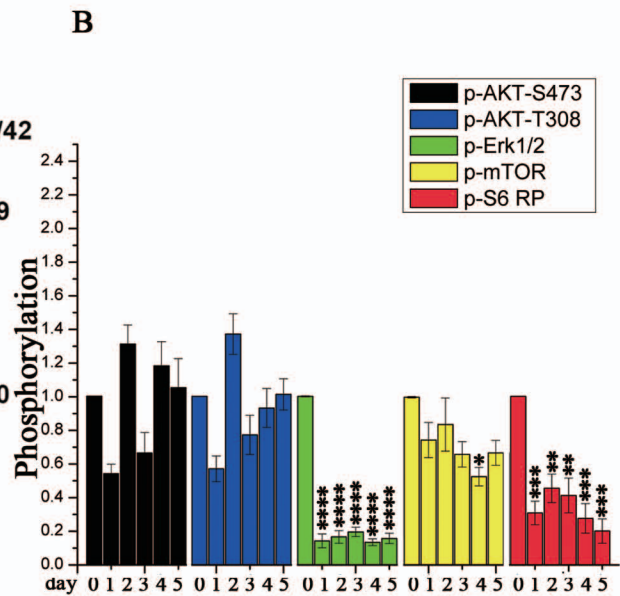

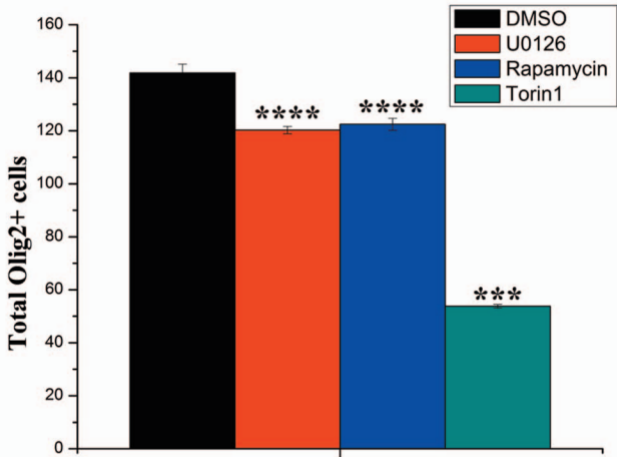

Supplement: NIHMS613726-supplement-Supp_FigureS1-S2.pdf [file NIHMS613726-supplement-Supp_FigureS1-S2.pdf]
